# Supplementary material for: Diels-Alder reactions using 4,7-dioxygenated indanones as dienophiles for regioselective construction of oxygenated 2,3-dihydrobenz[f]indenone skeleton
Source: Beilstein J Org Chem. 2008 May 15;4:15. doi: 10.3762/bjoc.4.15 (PMC2486486; doi:10.3762/bjoc.4.15)
Supplement: File 1 — Experimental part [file Beilstein_J_Org_Chem-04-15-s001.doc]

**Supporting Information: Experimental.doc**

**Diels-Alder reactions using 4,7-dioxygenated indanones as dienophiles for regioselective construction of oxygenated 2,3-dihydrobenz[*f*]indenone skeleton**

Natsuno Etomi, Takuya Kumamoto*, Waka Nakanishi and Tsutomu Ishikawa*

Graduate School of Pharmaceutical Sciences, Chiba University

1-33 Yayoi-cho Inage-ku, Chiba 263-8522 Japan

Fax: +81-43-290-2911

* Corresponding author

Experimental part

All melting points were measured on a Yanagimoto MPSI melting point apparatus and are uncorrected. IR spectra were recorded as a Nujol mull or with attenuated total reflectance system (ATR) on a JASCO FT / IR-300E spectrophotometer. 1H and 13C NMR spectra were recorded in CDCl3 on a JEOL JNM-GSX-400, JNM-ECP-400, or JNM-ECP-600. MS spectra were measured on a JEOL JNM MS-GC MATE for EIMS, and on a JEOL JMS-HX110 or a JEOL JMS-AX505 for FABMS. For column chromatography Kanto Chemical silica gel (SiO2) 60 spherical for normal, 60N spherical for neutral and Merck aluminium oxide (Al2O3) 90 (Brockman) were used. For preparative TLC (p-TLC) Merck Art 5744 DC-Fertigplatten Kieselgel 60 F254 was used. For TLC Merck Art 5715 DC-Fertigplatten Kieselgel 60 F254 was used. Anhydrous CH2Cl2 and THF were purchased from Kanto Chemical and Wako Chemical, respectively. Anhydrous CHCl3 was distilled from P2O5 before use. Microwave irradiation was done in a CEM Discover system in sealed tubes. Crude solutions after work-up were dried over Na2SO4 or MgSO4.

**4,7-Dimethoxyindan-1-one (17)**

CH3SO3H (5.4 mL, 83.1 mmol) was added to P2O5 (1.05 g, 7.40 mmol) under Ar atmosphere and the reaction mixture was stirred at 50 °C for 1 h. After cooling to rt, the reaction mixture was diluted with CH2Cl2 (10 mL) and a solution of acid **15** (434 mg, 2.06 mmol) in CH2Cl2 (8 mL) was added at rt. After stirring at rt for 19 h, the mixture was poured onto ice (50 mL), basified with 10% NaOH to pH 10 and extracted with CH2Cl2 (3 x 50 mL). The organic layers were combined and washed with sat. aq. NaHCO3 (1 x 70 mL), H2O (1 x 70 mL) and brine (1 x 70 mL), successively, then dried. The solvent was evaporated *in vacuo* and the residue was purified by column chromatography (CC) (Al2O3, *n*-hexane : AcOEt = 1 : 1) to give **17** as a pale yellow solid (266 mg, 67%).

mp 123-125 °C (lit. [1] 124-125 °C).

IR (Nujol): 1697 cm-1.

1H NMR (400 MHz):  2.67 (t, *J=*5.9 Hz, 2H), 2.99 (t, *J=*5.9 Hz, 2H), 3.86 (s, 3H), 3.90 (s, 3H), 6.73 (d, *J=*8.7 Hz, 1H), 6.99 (d, *J=*8.7 Hz, 1H).

**6-Bromo-4,7-dimethoxyindan-1-one (18)**

Following the procedure for the synthesis of **17**, **18** (627 mg, 71%) was obtained as yellow solids from **16** (943 mg, 3.26 mmol), CH3SO3H (8.4 mL, 129 mmol) and P2O5 (1.66 g, 11.7 mmol) in CHCl3 (44 mL).

mp 110-112 °C (lit. [1] 109-110 °C).

Anal Calcd for C11H11BrO3: C, 48.73; H, 4.09. Found: C, 48.69; H, 4.10.

IR (Nujol): 1718 cm-1 (lit. [1] 1700 cm-1).

1H NMR (400 MHz):  = 2.69 (t, *J=*5.9 Hz, 2H), 2.94 (t, *J=*5.9 Hz, 2H), 3.87 (s, 3H), 3.91 (s, 3H), 7.17 (s, 1H).

13C NMR (100 MHz):  = 22.1, 36.6, 56.0, 61.9, 116.0, 119.4, 130.8, 145.1, 148.1, 152.9, 203.5.

EIMS: *m/z* (%) = 272 [M(81Br)+, 80%], 270 [M(79Br)+, 84%], 243 (100%), 241 (95%).

**4-Bromo-2,5-dimethoxyhydrocinnamic acid (16)**

Bromine water (2.62 mmol as Br2), prepared by addition of 5% aq. NaOCl (3.8 g, 2.62 mmol) to an ice-cooled solution of NaBr (539 mg, 5.24 mmol) and 1N HCl (5.3 mL, 5.30 mmol) in H2O (17 mL), was added to a solution of **15** (501 mg, 2.38 mmol) in 1,4-dioxane - H2O (4 : 1, 2.4 mL) under ice-cooling within 75 min and the reaction mixture was stirred at rt for 2 h. The precipitates were filtered off, washed with H2O and dried under air to give colorless solids, which were recrystallized from EtOH to give **16** as colorless prisms (465 mg, 68%)

mp 134-137 °C (lit. [1] 136-137 °C).

IR (Nujol): 3300, 1699 cm-1.

1H NMR (400 MHz)  = 2.65 (t, *J*=7.6 Hz, 2H), 2.90 (t, *J*=7.6 Hz, 2H), 3.78 (s, 3H), 3.84 (s, 3H), 6.78 (s, 1H), 7.02 (s, 1H).

**2,3-Dihydroindene-1,4,7-trione (8)**

To a solution of **17** (199 mg, 1.04 mmol) in acetonitrile (5 mL), a solution of CAN (1.43 g, 2.61 mmol) in H2O (15 mL) was added under ice-cooling within 10 min. The resultant orange solution was stirred at 0 °C for 30 min. The whole was extracted with CHCl3 (3 x 15 mL) and the combined organic layers were washed with H2O (2 x 10 mL) and brine (2 x 10 mL), successively, and dried. The solvent was evaporated *in vacuo* and the residue was washed with a mixture of AcOEt - Et2O (5 : 1) to give **8** as a brown solid (110 mg, 65%). This compound was used immediately to the next step because of its instability.

mp 78-90 °C.

IR (Nujol): 1718, 1655 cm-1.

1H NMR (400 MHz):  = 2.65 (t, *J=*5.1 Hz, 2H), 2.94 (t, *J=*5.1 Hz, 2H), 6.81 (d, *J=*10.1 Hz, 1H), 6.90 (d, *J=*10.1 Hz, 1H).

13C NMR (100 MHz):  = 22.7, 35.2, 135.7, 136.5, 137.3, 168.4, 182.4, 186.6, 203.2.

**7-Hydroxy-4-methoxyindan-1-one (19)**

A suspension of **17** (851 mg, 4.43 mmol) and MgI2 · 6 H2O (1.76 g, 4.56 mmol) in benzene (85 mL) was refluxed for 10 h in a Dean-Stark apparatus. After cooling to rt, H2O (40 mL) and 10% HCl (40 mL) were added and the reaction mixture was extracted with AcOEt (3 x 80 mL). The combined organic layers were washed with H2O (2 x 80 mL) and brine (1 x 80 mL) and dried. The solvent was evaporated *in vacuo* and the residue was recrystallized from EtOH to give **19** as pale orange prisms (636 mg, 81%).

mp 122-124 °C. (lit. [2] mp 121-122 °C)

IR (Nujol): 3422, 1685 cm-1.

1H NMR (400 MHz):  = 2.71 (t, *J=*5.6 Hz, 2H), 3.04 (dif. t, *J=*5.6 Hz, 2H), 3.84 (s, 3H), 6.73 (d, *J=*8.7 Hz, 1H), 7.00 (d, *J=*8.7 Hz, 1H), 8.55 (s, 1H).

13C NMR (100 MHz):  = 22.8, 35.9, 56.0, 113.8, 119.1, 123.4, 142.3, 149.7, 160.7, 210.1.

EIMS: *m/z* (%) = 178 (M+, 100).

**6-Bromo-7-hydroxy-4-methoxyindan-1-one (20)**

Following the procedure for the synthesis of **19**, **20** (461 mg, 96%) was obtained as a pale yellow solid from **18** (508 mg, 1.88 mmol), MgI2 · 6 H2O (728 mg, 1.88 mmol) and benzene (50 mL).

mp 146-147.5 °C.

Anal Calcd for C10H9BrO3: C, 46.72; H, 3.53. Found: C, 46.36; H, 3.53.

IR (Nujol): 3361, 1671 cm-1.

1H NMR (400 MHz):  = 2.75 (t, *J=*5.5 Hz, 2H), 2.99 (t, *J=*5.5 Hz, 2H), 3.84 (s, 3H), 7.18 (s, 1H), 9.00 (s, 1H).

13C NMR (100 MHz):  = 22.6, 35.9, 56.2, 105.8, 121.6, 123.7, 142.2, 147.4, 149.9, 209.3.

EIMS: *m/z* (%) = 258 [M(81Br)+, 90%], 256 [M(79Br)+, 100%].

**6-Bromo-2,3-dihydroindene-1,4,7-trione (12)**

To a suspension of **20** (58 mg, 0.22 mmol) in acetonitrile - H2O (2 : 1, 0.7 mL), a solution of PIFA (192 mg, 0.45 mmol) in acetonitrile - H2O (2 : 1, 1.4 mL) was added at rt and the reaction mixture was stirred at rt for 30 min. H2O (2 mL) was added and the reaction mixture was extracted with CH2Cl2 (2 x 5 mL). The combined organic layers were washed with H2O (1 x 5 mL) and brine (1 x 5 mL) successively, and dried. The solvent was evaporated *in vacuo* and the residue was washed with Et2O to give **12** as an orange solid (47 mg, 86%). This compound was used immediately to the next step because of its instability.

mp 128 °C (dec.)

IR (Nujol):1720, 1670 cm-1.

1H NMR (400 MHz):  = 2.70 (t, *J=*5.1 Hz, 2H), 2.95 (t, *J=*5.1 Hz, 2H), 7.43 (s, 1H).

13C NMR (100 MHz):  = 23.0, 35.5, 136.3, 138.3, 140.4, 169.1, 174.3, 183.6, 201.5.

**4,4-Dimethoxy-2,3-dihydro-4*H*-indene-1,7-dione (13)**

Following the procedure for the synthesis of **12**, **13** (175 mg, 74%) was obtained as a pale yellow solid from **19** (202 mg, 1.13 mmol) in methanol (4.5 mL) and PIFA (499 mg, 1.13 mmol) in acetonitrile (2.3 mL)

mp 81-85 °C.

IR (Nujol): 1725, 1675 cm-1.

1H NMR (400 MHz):  = 2.59 (t, *J=*5.1 Hz, 2H), 2.85 (t, *J=*5.1 Hz, 2H), 3.36 (s, 6H), 6.44 (d, *J=*10.4 Hz, 1H), 6.91 (d, *J=*10.4 Hz, 1H).

13C NMR (100 MHz): = 24.1, 35.0, 51.3, 94.2, 133.1, 135.0, 141.8, 180.1, 184.3, 202.5.

HREIMS: *m/z* [M+] Calcd for C11H12O4: 208.0735; found: 208.0720.

**6-Bromo-4,4-dimethoxy-2,3-dihydro-4*H*-indene-1,7-dione (14)**

Following the procedure for the synthesis of **13**, **14** (63 mg, 92%) was obtained as a pale yellow solid from **20** (61 mg, 0.28 mmol) in methanol (1.0 mL) and PIFA (103 mg, 0.24 mmol) in acetonitrile (0.5 mL). An aliquot was recrystallized from methanol to give pale yellow needles.

mp 135-137 °C (dec).

IR (Nujol): 1734 cm-1.

1H NMR (400 MHz):  = 2.61 (t, *J=*5.1 Hz, 2H), 2.85 (t, *J=*5.1 Hz, 2H), 3.38 (s, 6H), 7.38 (s, 1H).

13C NMR (100 MHz):  = 24.0, 35.0, 51.5, 95.2, 128.9, 133.8, 142.4, 172.6, 184.3, 201.2.

HREIMS: *m/z* [M+] Calcd for C11H1179BrO4: 285.9840; found: 285.9843.

**DAR of indanetrione 8 and diene 7** (entry 1 in **Table 1**)

To a solution of **8** (160 mg, 0.99 mmol) in CH2Cl2 (1.6 mL), **7** (224 mg, 2.61 mmol) in CH2Cl2 (1.6 mL) was added at -16 °C and the reaction mixture was stirred at -16 °C for 3 h. The solvent was evaporated *in vacuo* and the residue was purified by column chromatography (SiO2, hexane - AcOEt = 2 : 1 to 1 : 1) to give a less polar propellane **22** as yellow needles (101 mg, 42%) and a more polar 2,3-dihydrobenz[*f*]indenone **21** as yellow needles (113 mg, 47%).

**(4a*SR*,8a*SR*)-8-Methoxy-5,8-dihydro-4a,8a-propanonaphthalene-1,4,9-trione (22)**

mp 100-103 °C (dec), 125-127 °C (melt).

AnalCalcd for C14H14O4: C, 68.28; H, 5.73. Found: C, 68.22; H, 5.80.

IR (Nujol): 1751, 1683, 1672 cm-1.

1H NMR (400 MHz):  = 1.70 (dddd, *J=*19.3, 4.6, 2.6, 1.9 Hz, 1H), 1.98 (m, 1H), 2.27 (m, 1H), 2.32 (m, 1H), 2.56 (m, 1H), 3.22 (s, 3H), 3.33 (ddd, *J=*19.3, 4.9, 2.0 Hz, 1H), 4.22 (dd, *J=*4.1, 1.7 Hz, 1H), 5.87 (ddd, *J=*10.2, 4.6, 2.7 Hz, 1H), 5.94 (dddd, *J=*10.5, 4.1, 2.2, 1.9 Hz, 1H), 6.70 (d, *J=*1.7 Hz, 2H).

13C NMR (150 MHz):  = 26.8, 33.3, 34.1, 50.1, 57.6, 71.3, 74.6, 123.9, 129.1, 137.8, 139.6, 193.1, 198.2, 206.3.

EIMS: *m/z* (%) = 246 (M+, 0.02%), 190 (42%), 84 (100%).

**(4a*SR*,5*RS*,8a*SR*)-5-Methoxy-2,3,4a,5,8,8a-hexahydro-1*H*-benz[*f*]inden-1,4,9-trione (21)**

mp 130-142 °C (dec), 158 °C (melt).

IR (Nujol): 1757, 1681 cm-1.

1H NMR (600 MHz):  = 2.09 (dd, *J=*20.2, 7.5 Hz, 1H), 2.61-2.64 (m, 2H), 2.80-2.83 (m, 2H), 3.11 (s, 3H), 3.14 (d, *J=*20.2 Hz, 1H), 3.25 (dd, *J=*6.8, 6.8 Hz, 1H), 3.30 (dd, *J=*6.8, 4.2 Hz, 1H), 3.99 (1H, dd, *J=*4.1, 2.8 Hz, 1H), 6.00 (m, 2H).

13C NMR (150 MHz):  = 21.4, 22.7, 35.8, 44.3, 52.9, 56.1, 72.6, 123.3, 131.1, 142.2, 172.1, 191.1, 199.8, 204.0.

HRFABMS: *m/z* [M+H+] Calcd for C14H15O4: 247.0970, found: 247.0973.

**DAR of bromoindanetrione 12 and diene 7: (4a*SR*,8a*SR*)-2-Bromo-8-methoxy-5,8-dihydro- 4a,8a-propanonaphthalene-1,4,9-trione (23)** (entry 6 in **Table 1**)

Following the procedure for the synthesis of **21** and **22**, **23** (121 mg, 89%) was obtained as a yellow oil from **12** (101 mg, 0.42 mmol) in CH2Cl2 (4.5 mL), **7** (93 mg, 1.11 mmol) and CH2Cl2 (5.5 mL). An aliquot was solidified with keeping in refrigerator for two weeks and washed with Et2O to give a pale yellow powder.

mp 109-111.5 °C.

IR (Nujol): 1757, 1655 cm-1.

1H NMR (400 MHz):  = 1.67 (ddd, *J*=18.8, 4.6, 2.4 Hz, 1H), 2.00 (ddd, *J*=13.8, 9.3, 2.4 Hz, 1H), 2.23 (m, 1H), 2.33 (m, 1H), 2.56 (ddd, *J*=19.2, 9.5, 1.8 Hz, 1H), 3.25 (s, 3H), 3.29 (ddd, *J*=18.8, 4.9, 1.6 Hz, 1H), 4.24 (br. d, *J*=2.0 Hz, 1H), 5.85 (ddd, *J*=10.2, 4.9, 2.4 Hz, 1H), 5.92 (1H, dddd, *J*=10.2, 4.0, 2.2, 1.7 Hz, 1H), 7.21 (s, 1H).

13C NMR (150 MHz):  = 26.6, 32.4, 33.5, 51.0, 57.9, 70.4, 74.3, 123.7, 128.5, 139.2, 140.5, 186.4, 194.7, 205.1.

HRFABMS: *m/z* [M+H+] Calcd for C14H1479BrO4: 325.0075: found: 325.0080.

**DAR of ketal 13 and diene 7 under thermal conditions** (entry 9 in **Table 1**)

A solution of **13** (33 mg, 0.16 mmol) and **7** (36 mg, 0.43 mmol) in toluene (0.6 mL) was refluxed in a sealed tube at 120 °C (bath temp) for 9 h. After cooling to rt, the solvent was evaporated *in vacuo* and the residue was purified by column chromatography (SiO2, benzene - AcOEt = 1 : 0 to 4 : 1) to give **19** (6 mg, 21%) and **22** (6 mg, 16%).

**DAR of bromoketal 14 and diene 7 under Lewis-acid conditions** (entry 11 in **Table 1**)

To a mixture of ZnCl2 (activated by heating with a heat gun under vacuum, 10 mg, 0.08 mmol) and **14** (103 mg, 0.36 mmol) in CH2Cl2 (0.9 mL), a solution of **7** (84 mg, 1.00 mmol) in CH2Cl2 (0.8 mL) was added at -18 °C and the whole was stirred at rt for 2 h. H2O (1.5 mL) was added and the reaction mixture was extracted with CH2Cl2 (2 x 5 mL). The combined organic layers were washed with H2O (1 x 5 mL) and brine (1 x 5 mL), then dried. The solvent was evaporated *in vacuo* and the residue was purified by CC (SiO2, hexane - AcOEt = 4 : 1) to give **20** (14 mg, 15%) and **23** (9 mg, 8%).

**6-Bromo-1,1-ethylenedioxy-4,7-dimethoxyindane (25)**

A mixture of **18** (1.25 g, 4.61 mmol), PPTS (1.16 g, 4.63 mmol) and ethylene glycol (2.60 mL, 46.6 mmol) in benzene (16 mL) was refluxed in a Dean-Stark apparatus for 17 h. The mixture was cooled to rt and the reaction was quenched by addition of H2O (20 mL) and sat. aq. NaHCO3 (20 mL). The aqueous layer was separated and extracted with AcOEt (3 x 20 mL). The combined organic layers were washed with sat. aq. NaHCO3 (1 x 20 mL), H2O (1 x 20 mL), and brine (1 x 20 mL), then dried. The solvent was evaporated *in vacuo* and the residue was purified by CC (SiO2, hexane - AcOEt = 10 : 1) to give **25** as a colorless powder (1.28 g, 89%).

mp 66-71 °C

IR (ATR) no characteristic absorption.

1H NMR (400 MHz):  = 2.28 (t, *J*=6.9 Hz, 2H), 2.77 (t, *J*=6.9 Hz, 2H), 3.79 (s, 3H), 3.85 (s, 3H), 4.03-4.09 (m, 2H), 4.18-4.24 (m, 2H), 6.95 (s, 1H).

13C NMR (100 MHz):  = 24.6, 37.8, 55.7, 61.5, 65.6, 115.4, 115.6, 117.8, 133.4, 136.8, 147.1, 152.5.

HRFABMS: *m/z* [M+H+] Calcd for C13H1679BrO4: 314.0232; found 315.0244.

**DAR of the ketal 25 and furan (9): 5,8-epoxy-1,1-ethylenedioxy-4,9-dimethoxy-2,3,5,8-tetrahydro- 1*H*-benz[*f*]indene (26) (i) with NaNH2** (entry 1 in **Table 2**)To a mixture of NaNH2 (60 mg, 1.54 mmol) in THF (0.15 mL) was added a solution of **9** (0.45 mL, 6.20 mmol) and **25** (121 mg, 0.39 mmol) in THF (0.55 mL) and the reaction mixture was stirred in a sealed tube at 50 °C for 14 h. After cooling to rt, H2O (4 mL) was added and the whole was extracted with AcOEt (3 x 5 ml). The combined organic layers were washed with H2O (1 x 5 mL) and brine (1 x 5 mL) and dried. The solvent was evaporated *in vacuo* and the residue was purified by CC (neutral SiO2, *n*-hexane : AcOEt = 5 : 1 to 2 : 1) to give **26** as a pale yellow oil (4 mg, 3%) and also some recovered **25** (97 mg, 79%). **26** solidified on standing and was washed with Et2O to give a beige solid.

mp 129-132 ºC.

IR (ATR) no characteristic absorption.

1H NMR (400 MHz):  = 2.29 (t, *J*=7.0 Hz, 2H), 2.76 (t, *J*=7.0 Hz, 2H), 3.85 (s, 3H), 3.87 (s, 3H), 3.98-4.03 (m, 2H), 4.13-4.20 (m, 2H), 5.97 (brs, 1H), 5.99 (brs, 1H), 7.00 (dd, *J*=5.3, 1.6 Hz, 1H), 7.02 (dd, *J*=5.3, 1.6 Hz, 1H).

13C NMR (100 MHz):  = 24.8, 38.5, 60.17, 60.18, 65.6, 65.6, 80.72, 80.73, 117.7, 132.2, 136.1, 137.3, 138.4, 142.1, 142.5, 145.4, 145.7.

HREIMS: *m/z* [M+] Calcd for C17H18O5: 302.1154; found: 302.1136.

**(ii) With LDA** (entry 5 in **Table 2**)

To a solution of diisopropylamine (0.05 mL, 0.38 mmol) in THF(0.2 mL), *n*-BuLi (1.45 M, 0.22 mL, 0.32 mmol) was added at -78 °C and the reaction mixture was stirred at 0 °C for 15 min. After cooling at -78 °C, a solution of **9** (0.05 mL, 0.69 mmol) and **25** (101 mg, 0.32 mmol) in THF (0.4 mL) was added and the reaction mixture was warmed gradually to rt within 3 h and stirred at the same temperature for 1 h. The mixture was diluted with AcOEt (3 mL) and washed with H2O (1 x 2 mL) and brine (1 x 2 mL), then dried. The solvent was evaporated *in vacuo* and the residue was purified by column chromatography (neutral SiO2, *n*-hexane: AcOEt = 5 : 1 to 2 : 1) to give **26** (29 mg, 30%) with 39% recovery of **25** (39 mg,).

**5,8-Epoxy-4,9-dimethoxy-2,3,5,8-tetrahydrobenz[*f*]inden-1-one (11)**

An aliquot (1.0 mL) of a solution of *conc.* HCl in methanol (1 drop / 8 mL) was added to **26** (45 mg, 0.15 mmol) and the reaction mixture was refluxed for 19 h. After cooling, the solvent was evaporated *in vacuo* and the residue was partitioned with AcOEt (10 mL) and H2O (5 mL). The organic layer was washed with H2O (1 x 5 mL) and brine (1 x 5 mL), then dried. The solvent was evaporated *in vacuo* and the residue was washed with Et2O followed by recrystallization from EtOH to give **11** as a gray solid (19 mg, 50%).

mp 149-151 °C.

IR (ATR): 1697 cm-1.

1H NMR (400 MHz)  = 2.66-2.69 (m, 2H), 2.93 (t, *J*=5.7 Hz, 2H), 3.94 (s, 3H), 3.97 (s, 3H), 6.04 (dd, *J*=1.8, 0.9 Hz, 1H), 6.06 (dd, *J*=1.8, 0.9 Hz, 1H), 7.02 (dd, *J*=5.6, 1.8 Hz, 1H), 7.08 (dd, *J*=5.6, 1.8 Hz, 1H).

13C NMR (100 MHz)  = 22.5, 37.4, 60.2, 61.3, 80.4, 80.9, 128.3, 137.2, 141.1, 143.2, 143.7, 145.9, 146.1, 150.2, 203.9.

HREIMS: *m/z* [M+] Calcd for C15H14O4: 258.0892; found: 258.0873.

**5-Hydroxy-4,9-dimethoxy-2,3-dihydrobenz[*f*]inden-1-one (27)**

An aliquot (0.4 mL) of a solution of *conc.* HCl in methanol (1 drop / 1 mL) and THF (0.2 mL) was added to **11** (14 mg, 0.053 mmol) and the reaction mixture was refluxed for 38 h. After cooling, the solvent was evaporated *in vacuo* and the residue was partitioned with AcOEt (5 mL) and H2O (3 mL). The organic layer was washed with H2O (1 x 5 mL) and brine (1 x 5 mL), then dried. The solvent was evaporated *in vacuo* and the residue was purified by preparative TLC (*n*-hexane - AcOEt = 3 : 1 x 5) to give **27** as a yellow solid (5 mg, 39%) with 42% recovery of **11** (6 mg).

mp 157-158 °C.

IR (ATR): 3302, 1705 cm-1.

1H NMR (400 MHz)  = 2.80 (diffused t, *J*=6.9 Hz, 2H), 3.29 (diffused t, *J*=6.9 Hz, 2H), 4.07 (s, 3H), 4.15 (s, 3H), 7.05 (dd, *J=*7.5, 0.9 Hz, 1H), 7.41 (dd, *J*=8.4, 7.5 Hz, 1H), 7.88 (dd, *J*=8.4, 0.9 Hz, 1H), 9.57 (s, 1H).

13C NMR (100 MHz)  = 22.3, 37.3, 61.8, 63.2, 113.8, 115.9, 121.3, 123.9, 127.4, 130.6, 135.7, 147.6, 152.6, 153.7, 203.5.

HREIMS: *m/z* [M+] Calcd for C15H14O4: 258.0892; found: 258.0899.

References

1. Coutts, R. T.; Malicky, J. L. *Can. J. Chem.* **1974,** *52,* 381–389. doi:[10.1139/v74-061](http://dx.doi.org/10.1139/v74-061)
2. Horaguchi, T.; Tamura, S.; Hiratsuka, N.; Suzuki, T. *J. Chem. Soc., Perkin Trans. 1* **1985,** 1001–1006. doi:[10.1039/P19850001001](http://dx.doi.org/10.1039/P19850001001)
